# Supplementary material for: Process Design and Techno-ECONOMIC Evaluation of a Decarbonized Cement Production Process Using Carbon Capture and Utilization
Source: MDPI journal article supplement (doi:10.3390/pr11072043), 2023-07-07
Supplement: s1 [file s1]

## SUPPLEMENTARY MATERIALS

**Table S1** Experimental data in the processes of kiln, NH<sub>3</sub>, urea, MeOH

|                                           |                            |                  |                            |                  |                            |
|-------------------------------------------|----------------------------|------------------|----------------------------|------------------|----------------------------|
| Kiln                                      |                            |                  |                            |                  |                            |
| Composition                               |                            |                  | Vol%                       |                  |                            |
| CO <sub>2</sub>                           |                            |                  | 18.9                       |                  |                            |
| N <sub>2</sub>                            |                            |                  | 60.6                       |                  |                            |
| H <sub>2</sub> O                          |                            |                  | 12.8                       |                  |                            |
| O <sub>2</sub>                            |                            |                  | 7.7                        |                  |                            |
| Ammonia synthesis reaction                |                            |                  |                            |                  |                            |
| Pressure (atm)                            |                            |                  | Mole fraction of ammonia   |                  |                            |
| 11.90476                                  |                            |                  | 0.517301                   |                  |                            |
| 29.10053                                  |                            |                  | 0.632353                   |                  |                            |
| 50.26455                                  |                            |                  | 0.759516                   |                  |                            |
| 100.5291                                  |                            |                  | 0.810554                   |                  |                            |
| 201.0582                                  |                            |                  | 0.878893                   |                  |                            |
| 400.7937                                  |                            |                  | 0.911765                   |                  |                            |
| 1001.323                                  |                            |                  | 0.964533                   |                  |                            |
| Urea synthesis reaction                   |                            |                  |                            |                  |                            |
| Ratio of NH <sub>3</sub> /CO <sub>2</sub> |                            |                  | Mole fraction of urea      |                  |                            |
| 1.942141                                  |                            |                  | 0.639897                   |                  |                            |
| 2.517574                                  |                            |                  | 0.688657                   |                  |                            |
| 2.990019                                  |                            |                  | 0.720177                   |                  |                            |
| 3.498908                                  |                            |                  | 0.770122                   |                  |                            |
| 4.004426                                  |                            |                  | 0.79986                    |                  |                            |
| 4.542522                                  |                            |                  | 0.824844                   |                  |                            |
| 5.509972                                  |                            |                  | 0.8231                     |                  |                            |
| 7.551729                                  |                            |                  | 0.86003                    |                  |                            |
| 9.525555                                  |                            |                  | 0.889826                   |                  |                            |
| 11.49789                                  |                            |                  | 0.910707                   |                  |                            |
| 19.54686                                  |                            |                  | 0.950847                   |                  |                            |
| Methanol synthesis reaction               |                            |                  |                            |                  |                            |
| 10 bar                                    |                            | 30 bar           |                            | 60 bar           |                            |
| Temperature (°C)                          | CO <sub>2</sub> Conversion | Temperature (°C) | CO <sub>2</sub> Conversion | Temperature (°C) | CO <sub>2</sub> Conversion |
| 100.6378                                  | 0.398769                   | 99.36224         | 0.738949                   | 101.2755         | 0.923694                   |
| 149.7449                                  | 0.227071                   | 149.7449         | 0.439681                   | 149.7449         | 0.738801                   |
| 200.7653                                  | 0.16827                    | 200.7653         | 0.298769                   | 200.1276         | 0.460061                   |
| 250.5102                                  | 0.16959                    | 248.5969         | 0.248775                   | 249.2347         | 0.327952                   |
| 300.2551                                  | 0.216365                   | 300.2551         | 0.23836                    | 350.6378         | 0.311526                   |

|          |          |          |          |          |          |
|----------|----------|----------|----------|----------|----------|
| 350      | 0.274871 | 349.3622 | 0.299799 | 300.8929 | 0.288211 |
| 399.7449 | 0.35537  | 399.7449 | 0.3671   | 399.7449 | 0.397892 |
| 450.1276 | 0.428536 | 449.4898 | 0.450532 | 450.1276 | 0.481322 |
| 499.8724 | 0.511968 | 499.8724 | 0.517833 | 499.8724 | 0.519299 |
| 550.2551 | 0.548477 | 550.2551 | 0.549943 | 550.2551 | 0.548477 |
| 599.3622 | 0.571793 | 599.3622 | 0.579125 | 599.3622 | 0.580591 |
|          |          |          |          |          |          |

**Table S2** Mathematical models of PEM water electrolysis

|                                            |                                                                                                                           |
|--------------------------------------------|---------------------------------------------------------------------------------------------------------------------------|
| Voltage                                    | $V(T, p) = e_{rev}(T, p) - e_{rev}(T, p)e^{\frac{-5I}{0.02}} + IR_i(T, p)$                                                |
| Current                                    | $I(T, p) = 0 \quad V \leq e_{rev}(T, p)$<br>$I(T, p) = \frac{1}{R_i(T, p)}(V - e_{rev}(T, p)) \quad V \geq e_{rev}(T, p)$ |
| Initial resistance of PEM system           | $R_i(T, p) = R_{i0} + k \ln\left(\frac{p}{p_0}\right) + dR_t(T - T_0)$                                                    |
| Reverse voltage                            | $e_{rev}(T, p) = e_{rev,0} + \frac{R(273 + T)}{2F} \ln\left(\frac{p}{p_0}\right)$                                         |
| The ideal voltage                          | $V_i = \frac{\Delta G}{2F}$                                                                                               |
| Gibbs free energy change of H <sub>2</sub> | $\Delta G = 285.84 - 163.2(273 + T)$                                                                                      |
| Hydrogen production rate                   | $v_H = \frac{60000v_m I}{2F}$                                                                                             |
| Molar volume rate (Ideal Gas)              | $v_m = \frac{R(273 + T)}{p}$                                                                                              |
| Input power                                | $P = I^2 R_i + I e_{rev} = R_i \left( \frac{2Fv_H}{60000v_m} \right)^2 + \left( \frac{2Fv_H}{60000v_m} \right) e_{rev}$   |

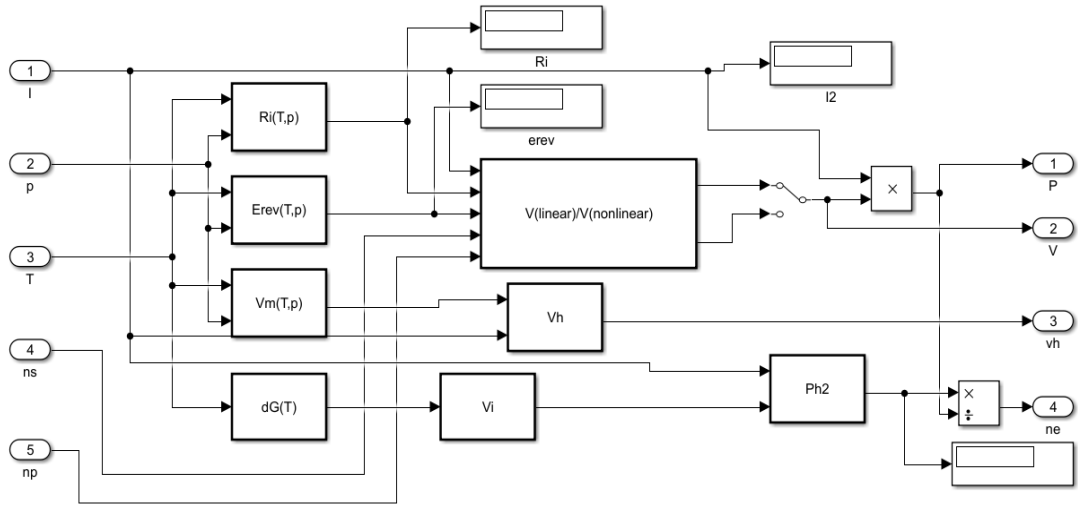

**Figure S1** Flowchart of PEM water electrolysis with Simulink™
